# Supplementary material for: C5-curcuminoid-dithiocarbamate based molecular hybrids: synthesis and anti-inflammatory and anti-cancer activity evaluation
Source: Royal Society of Chemistry journal article supplement (doi:10.1039/c4ra03655g), 2014-01-01

Electronic Supplementary Information

## C5-curcuminoid-dithiocarbamate based molecular hybrids: Synthesis, anti-inflammatory and anti-cancer activity evaluation

Amit Anthwal<sup>a,b</sup>, Kundan Singh<sup>a</sup>, M.S.M. Rawat<sup>b,\*</sup>, Amit K. Tyagi<sup>c</sup>, Bharat B. Aggarwal<sup>c</sup>, Diwan S. Rawat<sup>a,\*</sup>

### <sup>1</sup>H NMR of compound 4s

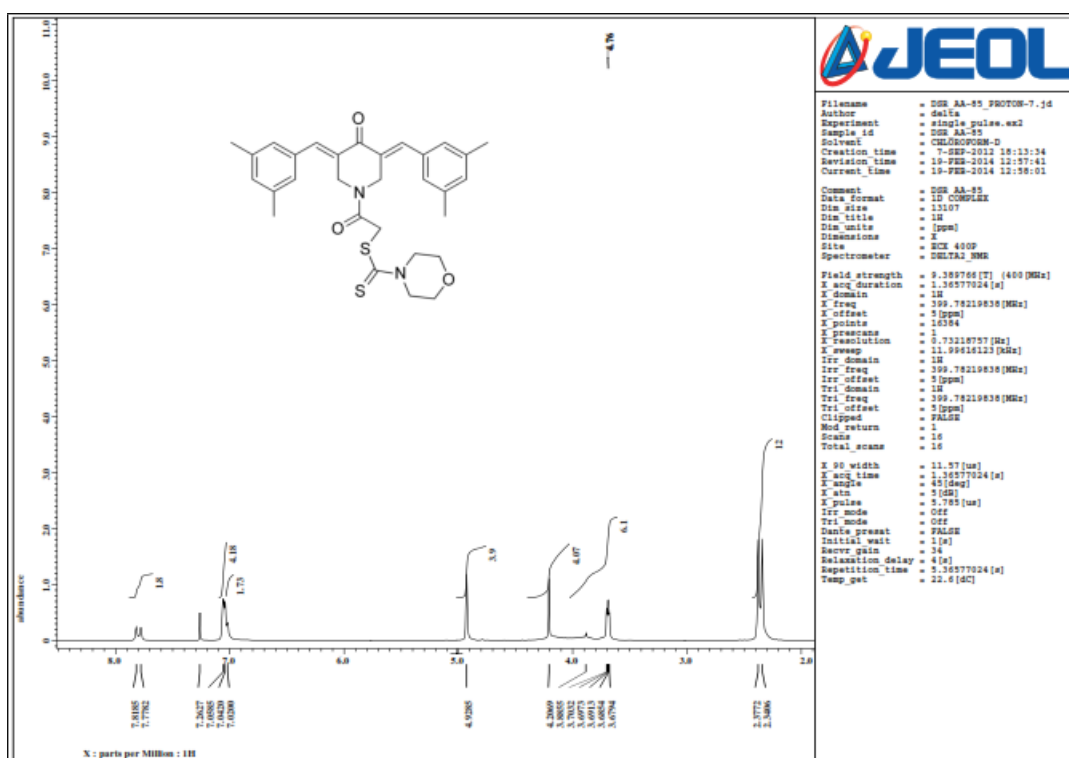

### <sup>13</sup>C NMR of compound 4s

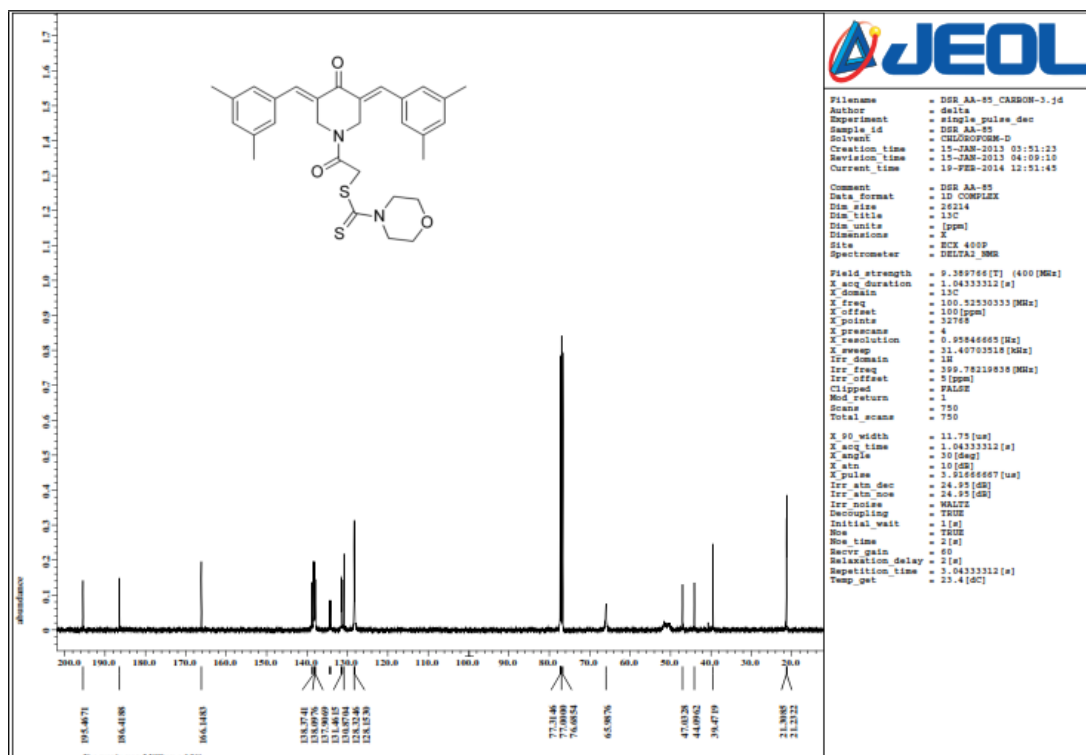

### <sup>13</sup>C NMR of compound 4t

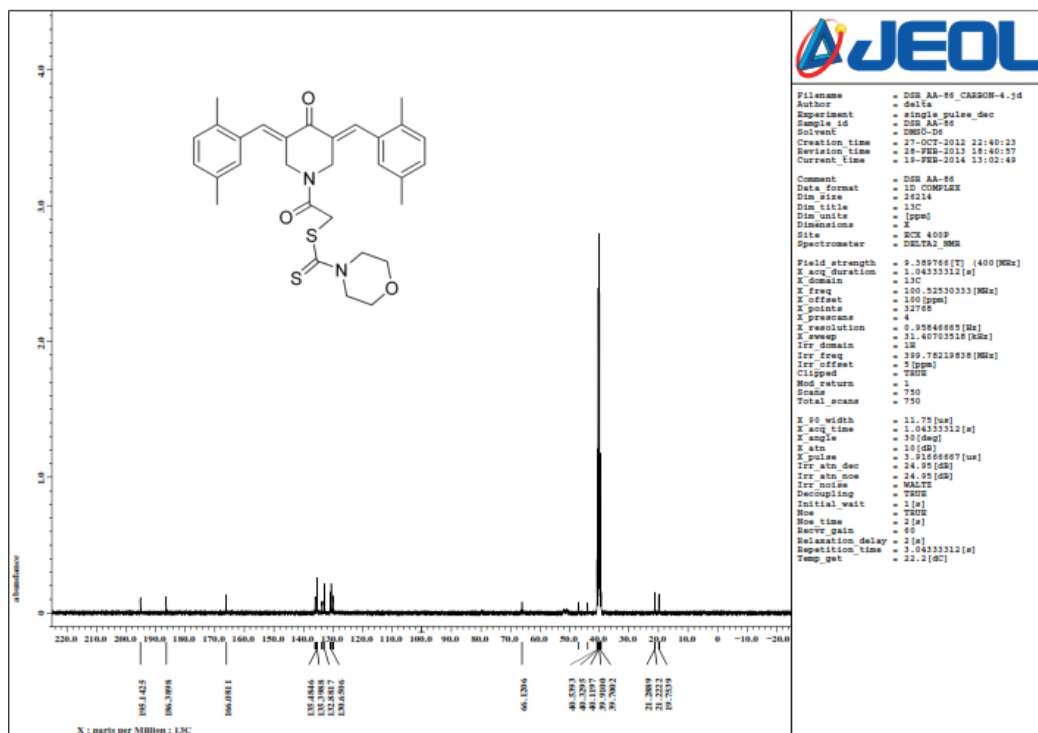

# <sup>1</sup>H NMR of compound 4t

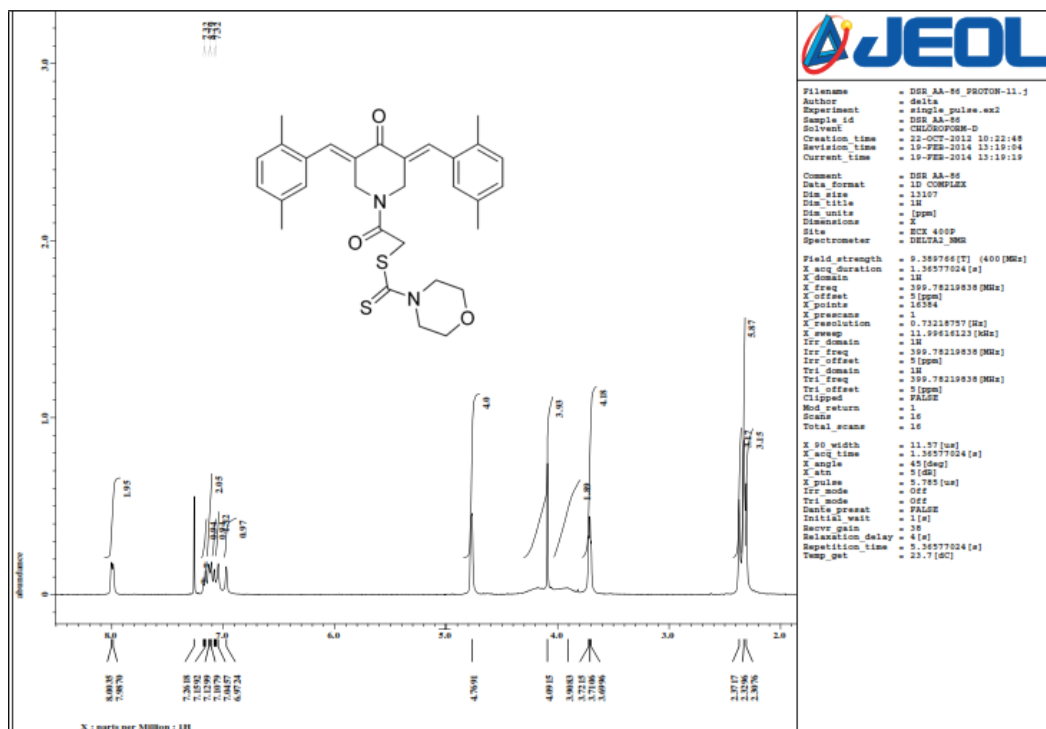

Supplement: c4ra03655g1.pdf [file c4ra03655g1.pdf]
